# Supplementary figures and images for: Interfacial modification of various alkali metal cations in perovskite solar cells and their influence on photovoltaic performance
Source: Royal Society of Chemistry journal article supplement (doi:10.1039/c9nj06342k), 2020-01-01

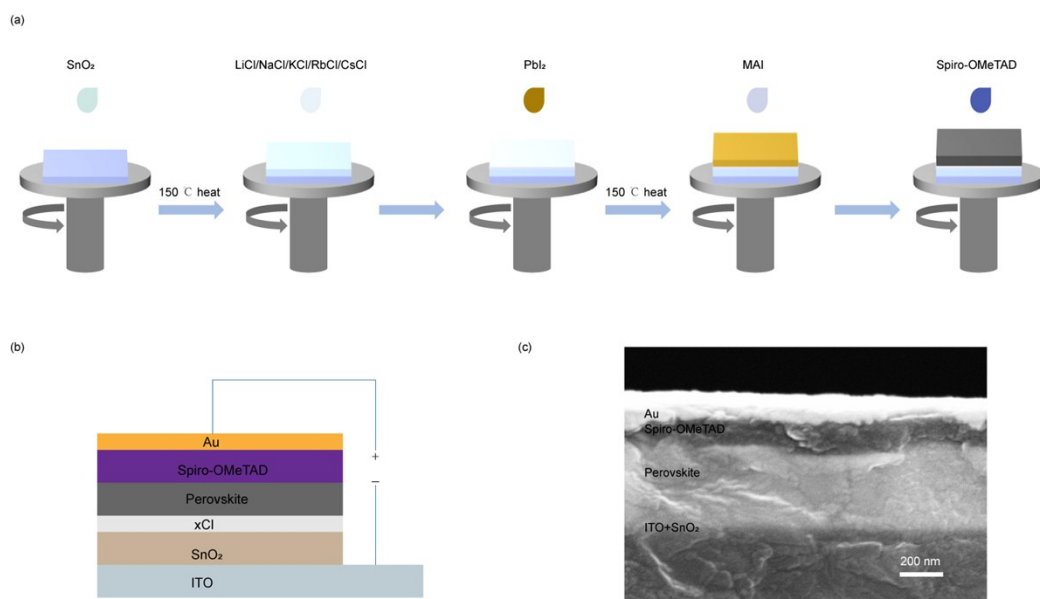

Fig. S1

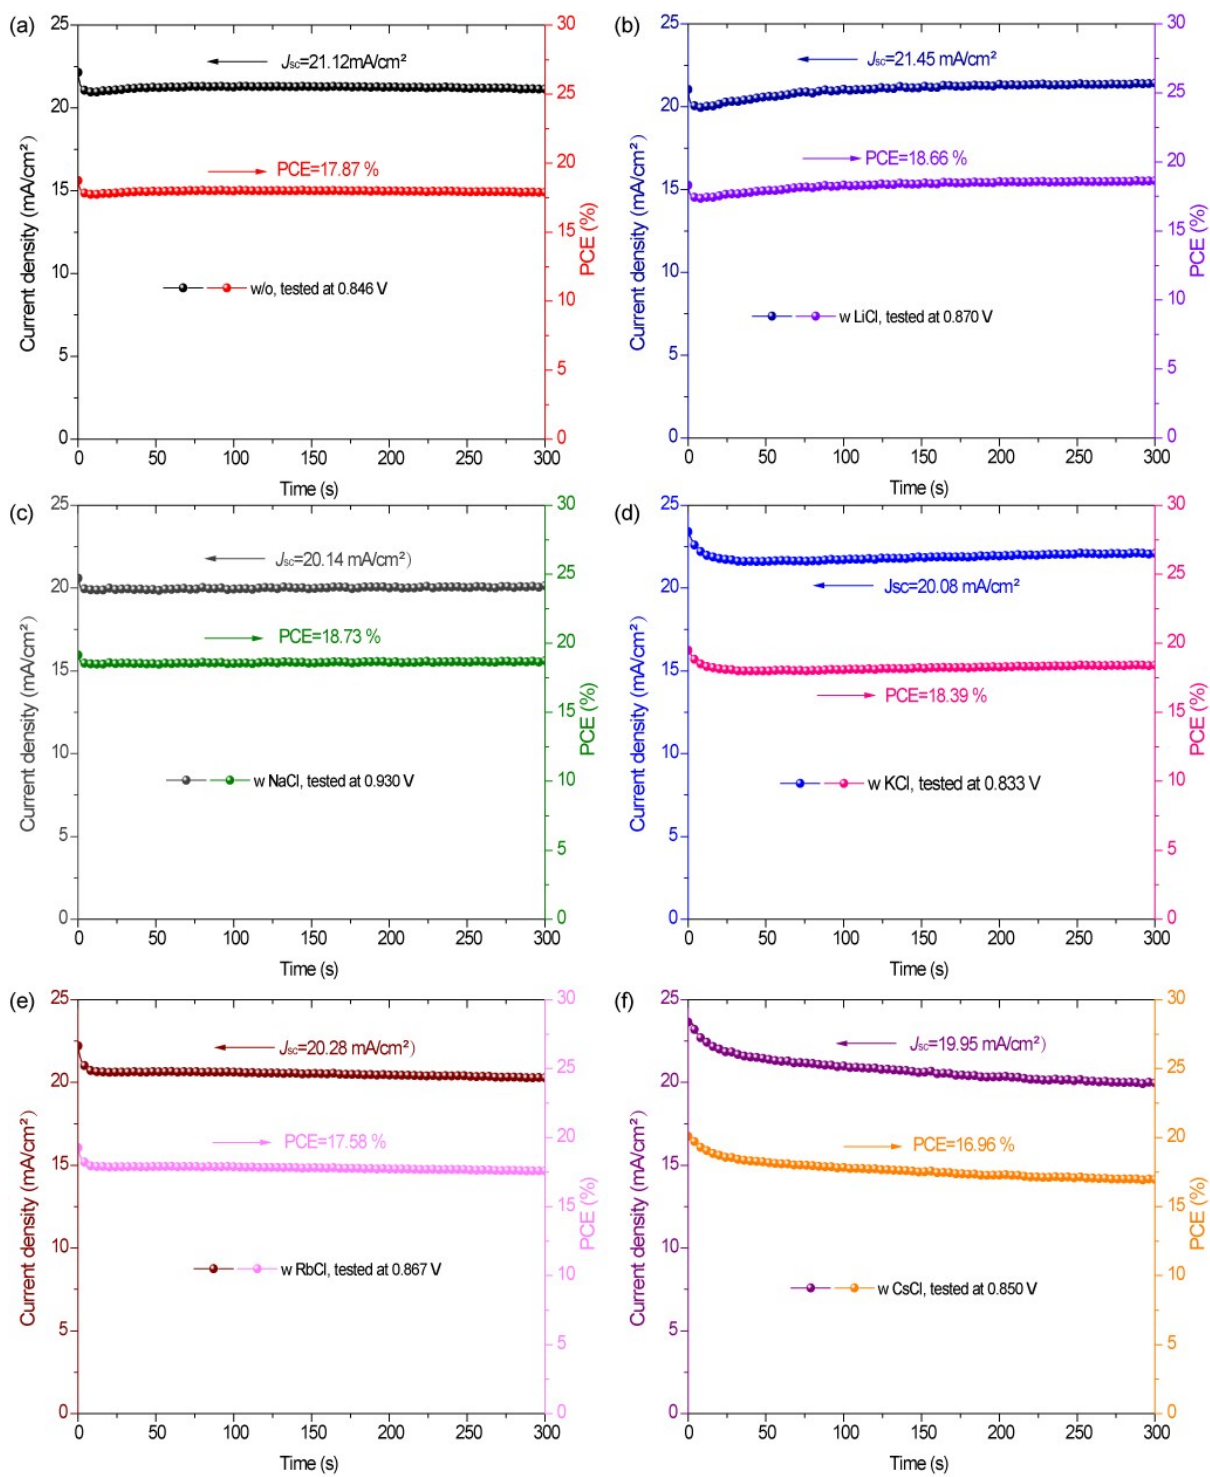

Fig. S2

Supplement: c9nj06342k1.pdf [file c9nj06342k1.pdf]
